# Supplementary material for: Disentangling the Contributions of Repeating Targets, Distractors, and Stimulus Positions to Practice Benefits in D2-Like Tests of Attention
Source: Oxford University Press journal article supplement (doi:10.1525/collabra.71297), 2023-01-01
Supplement: collabra_2023_9_1_71297_148390.docx [file collabra_2023_9_1_71297_148390.docx]

**Appendix**

**Table A1**. Matrix of product-moment correlations between performance measures observed in the two sessions of Experiment 1 for the **target-repetition condition** (upper panel, *N* = 68), and the **target-change condition** (lower panel, *N* = 65). The cells on the main diagonal show test-retest reliability. The cells below the main diagonal show correlations between measures in session 1. The cells above the main diagonal show correlations between different measures in session 2. The percentage of errors (%) reflects the sum of false alarms and misses for each session and participant.

|  | **Session 1** | | | |
| --- | --- | --- | --- | --- |
| **Session 2** | Hits | False Alarms (%) | Misses (%) | Errors (%) |
| Hits | .76*** | -.17 | -.56*** | -.58*** |
| False Alarms (%) | -.22 | .35** | .04 | .20 |
| Misses (%) | -.56*** | .32** | .75*** | .99*** |
| Errors (%) | -.56*** | .39*** | .99*** | .73*** |

Note. Significant correlations are flagged as * for p < .05, ** for p < .01, *** for p < .001.

|  | **Session 1** | | | |
| --- | --- | --- | --- | --- |
| **Session 2** | Hits | False Alarms (%) | Misses (%) | Errors (%) |
| Hits | .70*** | -.24 | -.40*** | -.43*** |
| False Alarms (%) | -.08 | .22 | .23 | .49*** |
| Misses (%) | -.31* | .03 | .34** | .96*** |
| Errors (%) | -.32* | .19 | .99*** | .35** |

Note. Significant correlations are flagged as * for p < .05, ** for p < .01, *** for p < .001.

**Table A2**. Matrix of product-moment correlations between performance measures observed in the two sessions of Experiment 2 for the **distractor-repetition condition** (upper panel, *N* = 51), and the **distractor-change condition** (lower panel, *N* = 51). The cells on the main diagonal show test-retest reliability. The cells below the main diagonal show correlations between measures in session 1. The cells above the main diagonal show correlations between different measures in session 2. The percentage of errors (%) reflects the sum of false alarms and misses for each session and participant.

|  | **Session 1** | | | |
| --- | --- | --- | --- | --- |
| **Session 2** | Hits | False Alarms (%) | Misses (%) | Errors (%) |
| Hits | .88*** | -.18 | -.30* | -.31* |
| False Alarms (%) | -.10 | .09 | .20 | .30* |
| Misses (%) | -.32* | .04 | .80*** | .99*** |
| Errors (%) | -.33* | .12 | .99*** | .79*** |

Note. Significant correlations are flagged as * for p < .05, ** for p < .01, *** for p < .001.

|  | **Session 1** | | | |
| --- | --- | --- | --- | --- |
| **Session 2** | Hits | False Alarms (%) | Misses (%) | Errors (%) |
| Hits | .84*** | -.39** | -.56*** | -.58*** |
| False Alarms (%) | .05 | .42** | .42** | .52*** |
| Misses (%) | -.57*** | .21 | .80*** | .99*** |
| Errors (%) | -.55*** | .31* | .99*** | .82*** |

Note. Significant correlations are flagged as * for p < .05, ** for p < .01, *** for p < .001.

**Table A3**. Matrix of product-moment correlations between performance measures observed in the two sessions of Experiment 3 for the **position-repetition condition** (upper panel, *N* = 50), and the **position-change condition** (lower panel, *N* = 61). The cells on the main diagonal show test-retest reliability. The cells below the main diagonal show correlations between measures in session 1. The cells above the main diagonal show correlations between different measures in session 2. The percentage of errors (%) reflects the sum of false alarms and misses for each session and participant.

|  | **Session 1** | | | |
| --- | --- | --- | --- | --- |
| **Session 2** | Hits | False Alarms (%) | Misses (%) | Errors (%) |
| Hits | .88*** | -.16 | -.56*** | -.54*** |
| False Alarms (%) | -.23 | .08 | .41** | .52*** |
| Misses (%) | -.29* | .09 | .88*** | .99*** |
| Errors (%) | -.30* | .14 | .99*** | .86*** |

Note. Significant correlations are flagged as * for p < .05, ** for p < .01, *** for p < .001.

|  | **Session 1** | | | |
| --- | --- | --- | --- | --- |
| **Session 2** | Hits | False Alarms (%) | Misses (%) | Errors (%) |
| Hits | .81*** | -.35*** | -.24 | -.28* |
| False Alarms (%) | -.09 | .51*** | .19 | .33** |
| Misses (%) | -.21 | .33* | .59*** | .99*** |
| Errors (%) | -.21 | .40** | .99*** | .60*** |

Note. Significant correlations are flagged as * for p < .05, ** for p < .01, *** for p < .001.
